# NMDAR hypofunction increases top-down influence on sensory processing

Adam Ranson<sup>1\*</sup>, Eluned Broom<sup>2</sup>, Anna Powell<sup>3</sup> & Jeremy Hall<sup>1</sup>.

<sup>1</sup>Neurosciences & Mental Health Research Institute, Cardiff University, Cardiff CF24 4HQ

<sup>2</sup>School of Biosciences, Cardiff University, Cardiff CF10 3AX

<sup>3</sup>School of Psychology, Cardiff University, Cardiff, CF10 3AT

## Abstract

Converging evidence implicates NMDAR disruption in the pathogenesis of schizophrenia, a condition in which perceptual disturbances are prominent. To explore how NMDAR hypofunction causes perceptual symptoms we investigated activity in cortical sensory circuits in awake behaving mice during pharmacologically induced NMDAR hypofunction. We observed a reduction in sensory-driven activity in V1 while input from the anterior cingulate cortex simultaneously increased, suggesting NMDAR hypofunction may lead to altered perception by modifying the balance of top-down and bottom-up processing.

## Main text

Hypofunction of the N-methyl-D-aspartate receptor (NMDAR) is implicated in the pathogenesis of schizophrenia. Evidence for this association has come both from large scale genetic studies<sup>1-4</sup>, as well as a large body of experimental work. In humans administration of sub anaesthetic doses of NMDAR antagonists such as ketamine and phencyclidine produce many of the symptoms of schizophrenia including disorganised thought and perceptual distortions<sup>5-7</sup>, and exacerbate symptoms in drug-free schizophrenic patients<sup>8</sup>. Interestingly, global disruption of NMDAR function appears to have differential effects in different cortical regions, with both human imaging and animal studies providing evidence for elevated activity in prefrontal brain regions while other areas such as sensory cortex show unchanged or decreased activation<sup>5,9-13</sup>. This regionally specific disruption of neural activity is relevant in the context of theories of the causes of hallucinations and other positive symptoms of schizophrenia which propose disturbances in transmission of predictive signals from higher to lower levels of

the cortical hierarchy (termed 'top-down' signals) as a potential cause of perceptual disturbances and in turn delusions<sup>14,15</sup>. One attractive hypothesis is that the perceptual disturbances observed in schizophrenia might be due to an altered balance of influence on of internally generated top-down signals verses bottom-up (sensory) signals on sensory cortex.

In order to directly investigate the effects of global NMDAR antagonism on the integration of bottom-up and top-down signals during sensory processing we used *in vivo* calcium imaging in awake mice (**Fig 1a**). During ongoing visual stimulation, we measured activity of excitatory and inhibitory neurons in primary visual cortex (V1), and contrasted this with the activity of top-down axons originating from the ACC and measured at their termination site in layer 1 of V1. These axons provide long range top-down feedback to layer 1 of V1, and are thought to mediate attentional and predictive signals<sup>16,17</sup>. Following baseline recordings, top-down ACC axons and V1 activity were then re-measured after either systemic injection of the NMDAR antagonist MK801 or saline control. In order to

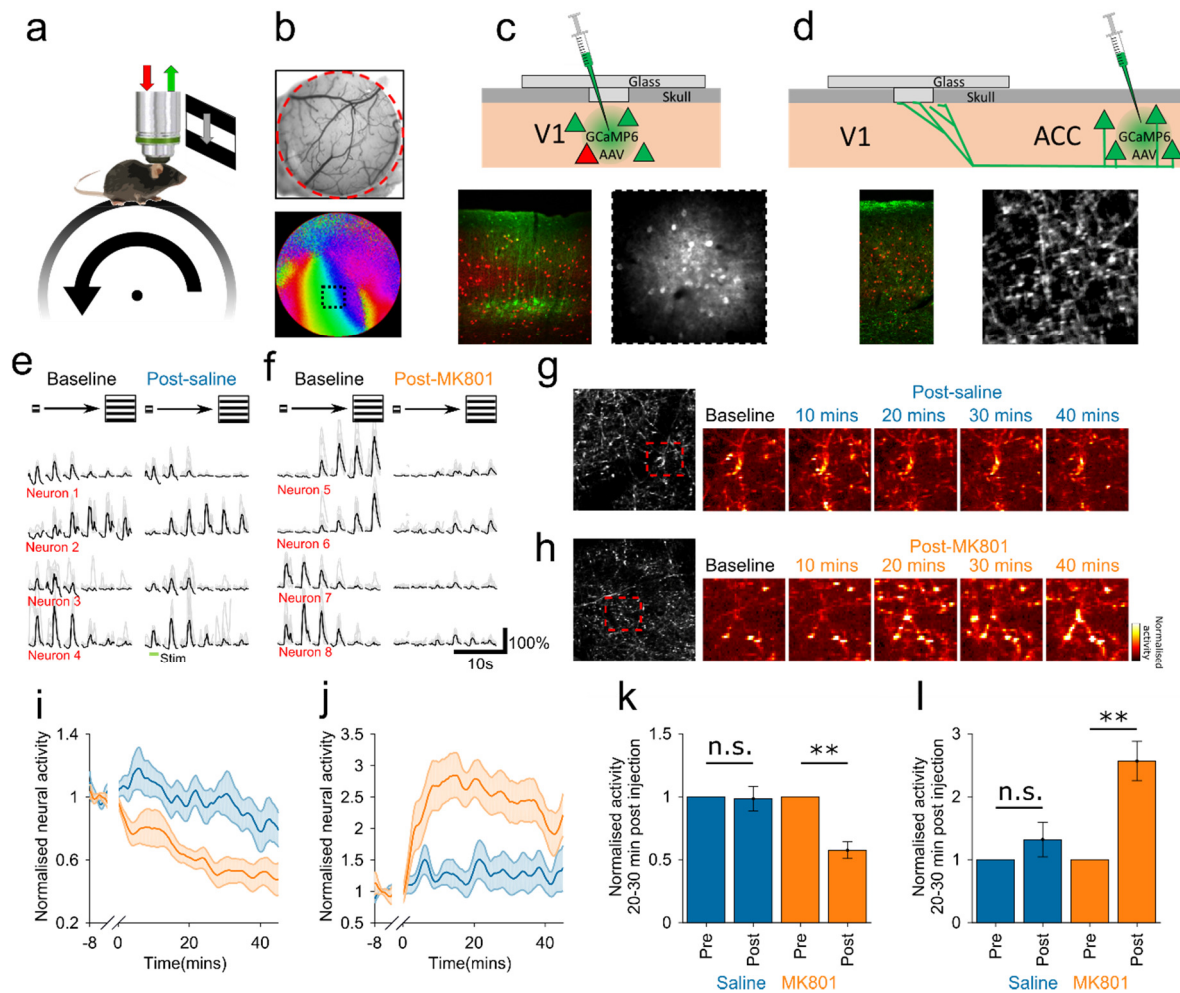

**Figure 1: Opposite modulation of sensory versus top down drive to sensory cortex during NMDAR antagonism.** (a) Schematic of visual stimulation and recording setup. (b) Cranial window and intrinsic signal functional map of V1 with representative field of view placement (black square). (c-d) Schematic of V1 soma and ACC axon recording configuration, and *ex vivo* and *in vivo* images of recorded tissue. (e-f) Examples traces of averaged stimulus evoked responses of single V1 putative excitatory neurons pre and post injection in saline (e) and MK801 (f) conditions. (g-h) Example activity maps of V1→ACC axons at baseline and after administration of saline (g) or MK801 (h). (i-j) Normalised V1 somatic population activity (i) and V1→ACC axon activity (j) after saline (blue) or NMDAR antagonist injection (orange, MK801) during visual stimulation. (k-l) Average activity of V1 population (k) or ACC axons (l) at 20-30 minutes post injection during visual stimulation.

65 record V1 activity, neurons were labelled with the  
 66 genetically encoded calcium indicator GCaMP6S,  
 67 targeted using intrinsic signal functional imaging  
 68 (Fig 1b). In addition PV+ interneurons were co-  
 69 labelled with tdTomato using a PV-cre mouse line  
 70 (Fig 1c). Activity of top-down projections to V1  
 71 from ACC were recorded by transfecting ACC  
 72 neurons with GCaMP6S and recording their axons  
 73 at their termination site in layer 1 of V1 (Fig 1d).  
 74 Recordings were made in awake head-  
 75 immobilised mice, free to walk on a cylindrical

76 treadmill (Fig 1a; see methods). After a baseline  
 77 recording and visual stimulation period, animals  
 78 were administered with either a sub-anaesthetic  
 79 dose of the NMDAR antagonist MK801 (0.1mg/kg  
 80 s.c., the previously established optimal dose to  
 81 elicit increased PFC activity<sup>5,11</sup>) or the same  
 82 volume of saline and recording was then  
 83 continued for 45 minutes under identical  
 84 stimulation conditions. Strikingly, in contrast to  
 85 reports from other cortical regions (PFC<sup>5,11</sup>;  
 86 retrosplenial cortex<sup>12</sup>), MK801 treatment reduced

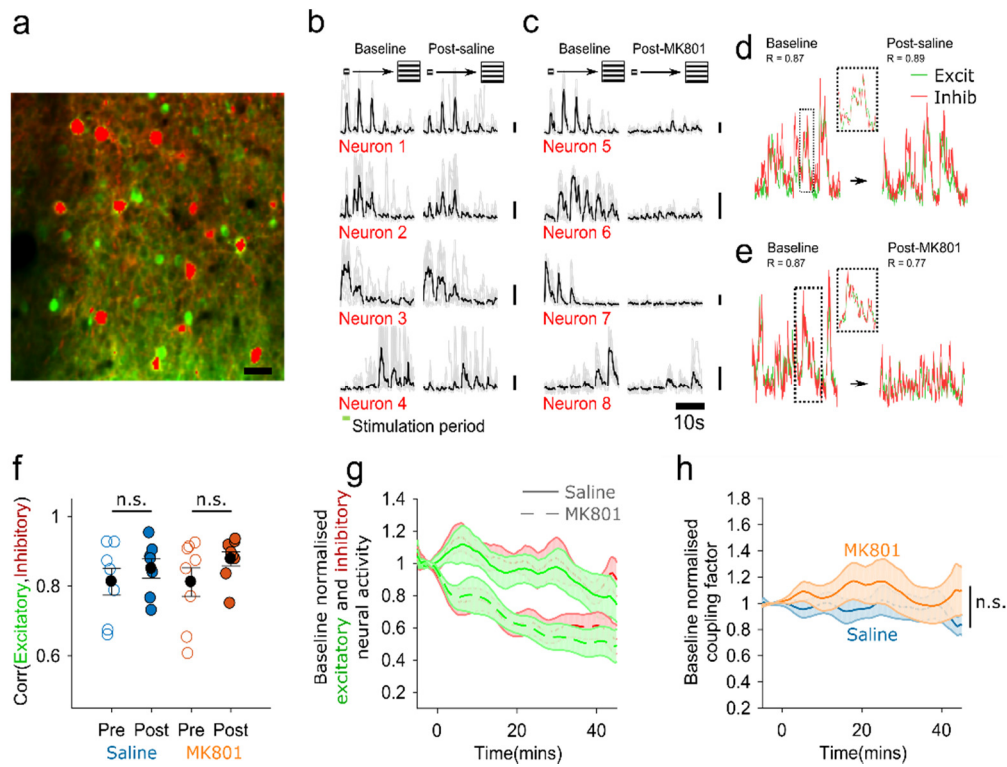

**Figure 2: Putative excitatory and inhibitory populations show coupled reduction in activity during NMDAR antagonism.** (a) PV+ interneurons co-labelled with tdTomato and GCaMP6S. (b-c) Example pre and post injection stimulus evoked responses of PV+ interneurons in saline (b) and MK801 (c) conditions. (d-e) Example traces of highly correlated putative excitatory (green) and inhibitory (red) population activity in V1 at baseline and 30 mins after injection of saline (d) or MK801 (e). (f) Correlation of putative excitatory and inhibitory populations in individual animals pre and post injection. (g) Timecourse of putative excitatory (green) and inhibitory (red) population activity in saline (solid) or MK801 (dashed) conditions. (h) Timecourse of baseline normalised excitatory:inhibitory coupling factor in saline (blue) and MK801 (orange) conditions.

87 V1 population activity by approximately 40%  
 88 while no reduction in activity was observed after  
 89 saline injection (Baseline normalised activity:  
 90 Saline =  $0.99 \pm 0.096$ ,  $n = 7$  mice,  $P = 0.23$ , MK801  
 91 =  $0.57 \pm 0.066$ ,  $n = 9$  mice,  $P = 0.0002$ ; **Fig 1e,f**,  
 92 **Supplementary Video. 1**). In contrast during the  
 93 same period we observed and approximate 2.5  
 94 fold increase in activity of top-down input from  
 95 ACC while after saline administration no change  
 96 was observed (Baseline normalised activity:  
 97 Saline =  $1.32 \pm 0.275$ ,  $n = 6$  mice,  $P = 0.3$ , MK801  
 98 =  $2.57 \pm 0.313$ ,  $n = 7$  mice,  $P = 0.002$ ; **Fig 1g,h**,  
 99 **Supplementary Video. 1**). Consistent with  
 100 previous freely moving behavioural studies we  
 101 reliably observed increased locomotor behaviour  
 102 after MK801 administration (**Supplementary Fig.**  
 103 **1a**). Locomotion is associated with increased  
 104 activity in a number of brain regions including

105 frontal cortex and sensory cortex and changes in  
 106 locomotor behaviour could potentially influence  
 107 neuronal activity in V1 or ACC. While we observed  
 108 differential activity changes in V1 (decreased  
 109 activity) and ACC (increased activity) on MK801  
 110 treatment we nevertheless sought to examine the  
 111 extent to which altered neural activity in general  
 112 could be accounted for by a change in locomotor  
 113 behavioural state. To address this question we  
 114 limited our analysis of V1 and ACC activity to pre  
 115 and post injection periods of matched locomotor  
 116 activity (moving periods) and found a similar  
 117 pattern whereby NMDAR blockade resulted in  
 118 decreased activity in V1, and increased activity of  
 119 top down input from ACC (**Supplementary Fig.**  
 120 **1b,c**) suggesting differences in locomotor  
 121 behaviour was not in itself the cause of changes  
 122 observed in neural activity.

123 Next we attempted to control for the possibility  
124 that the differences described between V1 and  
125 ACC might be due to differences in the recorded  
126 neuronal compartment, or differential effects of  
127 MK801 on axons versus somas. We made  
128 recordings from the retrosplenial cortex which  
129 also provides long distance top-down input to V1,  
130 and in which both axons and somas are optically  
131 accessible, and found that somas and axons  
132 behaved similarly suggesting the effects observed  
133 are due to different effects of MK801 on different  
134 brain regions (**Supplementary Fig. 2**).

135 Previous studies have reported an alteration in  
136 inhibitory/excitatory balance in the mPFC  
137 following global NMDAR antagonism, resulting  
138 from decreased activity of fast spiking inhibitory  
139 neurons and increased activity of putative  
140 excitatory neurons<sup>5,11</sup>. Given the contrasting  
141 pattern of reduced net activity with NMDAR  
142 antagonism we observed in V1 we sought to  
143 examine what excitatory/inhibitory activity might  
144 underlie it. We broke down the population into  
145 genetically identified parvalbumin positive  
146 inhibitory neurons (PV+; **Fig 2a**) and putative  
147 excitatory pyramidal neurons (Pyr) and found that  
148 the activity of the two populations was tightly  
149 coupled under control conditions (mean  $R = 0.81$   
150  $\pm 0.04$ ,  $n = 7$  mice; **Fig 2 d,e,f**). We then compared  
151 the activity of the two populations following  
152 MK801 administration and found that the  
153 reduction in net population activity was  
154 associated with decreased activity of both cell  
155 types (Baseline normalised activity: Pyr Saline =  
156  $0.96 \pm 0.095$ , PV+ Saline =  $0.99 \pm 0.109$ ,  $n = 7$  mice;  
157 Pyr MK801 =  $0.58 \pm 0.072$ , PV+ MK801 =  $0.607 \pm$   
158  $0.083$ ,  $n = 9$  mice; Pyr  $P < 0.01$ ; PV+  $P < 0.05$ ; **Fig**  
159 **2f,g**). We additionally calculated a normalised  
160 ratio of PV+ inhibitory activity to putative  
161 excitatory activity and examined signal  
162 correlations of the two sub-populations before  
163 and after drug treatment, and found that both  
164 measures remained stable over the course of the  
165 experiment in both treatment groups (**Fig 2f,h**).

166 These findings together suggest that global  
167 NMDAR hypofunction has different  
168 consequences on excitatory/inhibitory balance in  
169 different cortical regions, resulting in increased  
170 activity of top down inputs to sensory cortex but  
171 decreased activity of neurons within V1.

172 We finally investigated the functional  
173 consequences of this altered ratio of top-down  
174 versus bottom-up influence on population  
175 encoding of sensory stimuli. A multi-class support  
176 vector machine (SVM) classifier was used to  
177 decode which visual stimulus was presented  
178 based on V1 neural activity, and to examine the  
179 effect of NMDAR antagonism on decoding  
180 accuracy. The SVM was trained on the baseline  
181 (pre saline or pre drug) visually evoked activity,  
182 and then tested over the following 45 minutes  
183 after injection on independent data. We used a  
184 leave-n-out strategy to first demonstrate that the  
185 SVM could decode V1 activity with a high degree  
186 of accuracy during the baseline period, and that  
187 decoding accuracy was similar at baseline (pre-  
188 treatment) in saline and drug groups (saline:  
189 accuracy =  $64.1 \pm 2.29\%$ , shuffled accuracy =  
190  $16.80 \pm 0.12\%$ ,  $n = 7$  mice; MK801 accuracy =  $62.3$   
191  $\pm 4.06\%$ , shuffled accuracy =  $16.66 \pm 0.11\%$ ,  $n = 9$   
192 mice; **Fig 3a**). We next tested the SVM on a sliding  
193 window of 30 visual stimulation trials at a time,  
194 normalising classifier performance to the pre-  
195 drug/saline period, and observed a decline in  
196 classification accuracy after MK801 treatment  
197 (accuracy =  $41 \pm 6.7\%$ ,  $p < 0.001$ ) while classifier  
198 performance did not change significantly after  
199 saline treatment (accuracy =  $56 \pm 7.0\%$ ,  $p = 0.28$ )  
200 or in the shuffled condition (**Fig 3b,c**, see  
201 **Supplementary Fig. 3** for a similar analysis of  
202 decoding of stimulus orientation). In order to  
203 assess the effect of differences in mean  
204 population activity in the pre and post periods,  
205 visual responses were scaled to equalise pre and  
206 post administration population response  
207 amplitude and a similar decline in classifier  
208 performance was observed following MK801



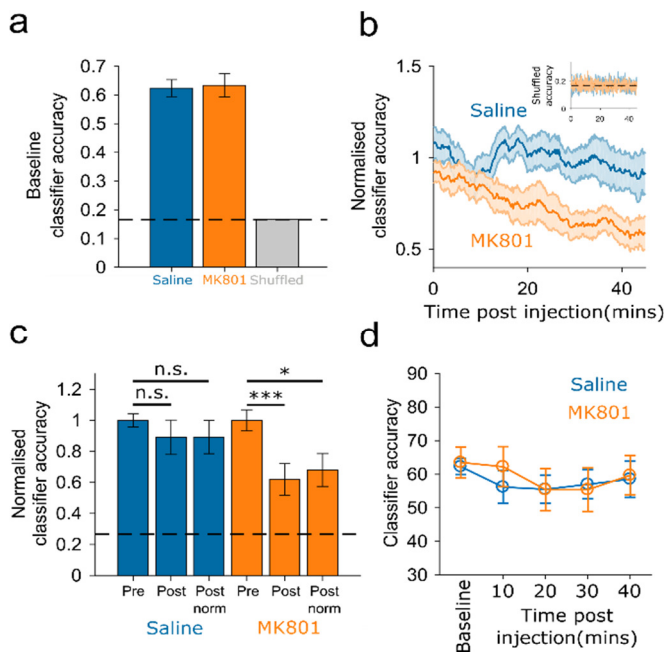

**Figure 3: The effects of NMDAR antagonism on support vector machine population decoding of visual stimulus.** (a) Accuracy of classifier at baseline. (b) Timecourse of normalised classification accuracy after training on baseline data, following saline (blue) or MK801 (orange) administration, and timecourse of shuffled performance (inset). (c) Average baseline normalised classification accuracy following saline (blue) or MK801 (orange) administration, without or with scaling of mean population response amplitude ('Post' and 'Post norm' respectively). (d) Classification accuracy at different time points post injection calculated using 'leave-n-out' cross validation when training data is from the same epoch as testing data.

209 administration (Fig 3c, 'Post norm'). We next  
 210 asked whether there is a loss or an alteration of  
 211 stimulus encoding during NMDAR hypofunction.  
 212 Instead of training the model on baseline visually  
 213 evoked activity we divided the post  
 214 administration period into 4 epochs and  
 215 performed leave-n-out cross validated training  
 216 and testing on data from each epoch  
 217 independently. This resulted in stable classifier  
 218 performance over the course of the post  
 219 administration period (Fig 3d) indicating that  
 220 stimulus encoding is present following MK801  
 221 administration but in an altered scheme, while  
 222 following saline administration the pre-  
 223 administration scheme is preserved.

224 In summary this study provides evidence that  
 225 global NMDAR antagonism, a pharmacological  
 226 model of schizophrenia which is known to elicit  
 227 perceptual disturbances in humans, results in a  
 228 coordinated reduction in both excitatory and  
 229 inhibitory activity in V1, in parallel with enhanced  
 230 top-down drive from the ACC. We suggest that  
 231 this shift in balance between top-down and  
 232 bottom-up signals may result in perceptual  
 233 disturbances by increasing the influence of  
 234 internally generated signals (representing, for  
 235 example, prior expectations) over sensory signals  
 236 from the outside world. This may be one instance  
 237 of a more general pattern of top-down/bottom-  
 238 up imbalance in different cortical circuits and at  
 239 different levels in the hierarchy of cortical  
 240 processing in neuropsychiatric disease. Given the  
 241 convergence of genetic risk factors for  
 242 schizophrenia and related disorders on the NMDA  
 243 receptor complex and associated synaptic  
 244 components<sup>4</sup> these processes may be broadly  
 245 relevant to the pathogenesis of altered cortical  
 246 processing in psychiatric disorders.

## 247 References

- 248 1. Fromer, M. et al. *Nature* **506**, 179–184  
 249 (2014).
- 250 2. Kirov, G. et al. *Mol. Psychiatry* **17**, 142–53  
 251 (2012).
- 252 3. Pocklington, A.J. et al. *Neuron* **86**, 1203–  
 253 1214 (2015).
- 254 4. Hall, J., Trent, S., Thomas, K.L., O'Donovan,  
 255 M.C. & Owen, M.J. *Biol. Psychiatry* **77**, 52–  
 256 58 (2015).
- 257 5. Homayoun, H. & Moghaddam, B. *J.*  
 258 *Neurosci.* **27**, 11496–11500 (2007).
- 259 6. Krystal, John H;karper, Laurence; Seibyl,  
 260 John; Freeman, Glenna; Delaney, Richard;  
 261 Bremner, Douglas; Heninger, George;  
 262 Bowers, Malcolm; Charney, D. *Arch Gen*  
 263 *Psychiatry* **51**, 199–214 (1994).
- 264 7. Luby Ed, C.B.R.G.G.J.K.R. *A.M.A. Arch.*  
 265 *Neurol. Psychiatry* **81**, 363–369 (1959).

- 266 8. Malhotra, A.K. et al.  
267 *Neuropsychopharmacology* **17**, 141–150  
268 (1997).
- 269 9. Lahti, A.C., Holcomb, H.H., Medoff, D.R. &  
270 Tamminga, C.A. *Neuroreport* **6**, 869–872  
271 (1995).
- 272 10. Gordon, B., Daw, N.W., Kirsch, J.D. & Reid,  
273 S.N.M. *Investig. Ophthalmol. Vis. Sci.* **37**,  
274 (1996).
- 275 11. Jackson, M.E., Homayoun, H. &  
276 Moghaddam, B. *Proc. Natl. Acad. Sci. U. S.*  
277 *A.* **101**, 8467–72 (2004).
- 278 12. Li, Q., Clark, S., Lewis, D. V & Wilson, W.A.  
279 *J. Neurosci.* **22**, 3070–3080 (2002).
- 280 13. Vollenweider, F.X., Leenders, K.L., Øye, I.,  
281 Hell, D. & Angst, J. *Eur.*  
282 *Neuropsychopharmacol.* **7**, 25–38 (1997).
- 283 14. Fletcher, P.C. & Frith, C.D. *Nat. Rev.*  
284 *Neurosci.* **10**, 48–58 (2009).
- 285 15. Friston, K.J. & Frith, C.D. *Clin. Neurosci.* **3**,  
286 89–97 (1995).
- 287 16. Zhang, S. et al. *Science (80-. )*. **345**, 660–  
288 665 (2014).
- 289 17. Fiser, A. et al. *Nat. Neurosci.* **19**, 1658–  
290 1664 (2016).
- 291

## 292 Experimental procedures

### 293 Animals

294 All experimental procedures were carried out in  
295 accordance with institutional animal welfare  
296 guidelines, and licensed by the UK Home Office.  
297 Experiments were carried out on adult mice (aged  
298 >P90). For experiments in which PV interneurons  
299 were labelled this was achieved by crossing the  
300 B6.Cg-Gt(ROSA)26Sortm14(CAG-  
301 tdTomato)Hom/J and B6;129P2-  
302 Pvalbtm1(cre)Arbr/J (Jackson Laboratory, JAX  
303 Stock#007914 and 008069 respectively). Mice  
304 were housed under normal light conditions (14h  
305 light, 10h dark) and recordings were made during  
306 the light period.

### 307 Animal surgical preparation and virus injection

308 Aseptic surgical procedures were conducted  
309 based largely on previously described protocols<sup>2</sup>.  
310 Approximately one hour prior to cranial window  
311 surgery and virus injection, animals were  
312 administered with the anti-biotic Baytril (5mg/kg,  
313 s.c.) and the anti-inflammatory drugs Carprofen  
314 (5mg/kg, s.c.) and Dexamethasone (0.15mg/Kg,  
315 i.m.). Anaesthesia was induced and maintained  
316 using Isoflurane at concentrations of 4%, and 1.5-  
317 2% respectively. After animals were  
318 stereotaxically secured, the scalp and periosteum  
319 were removed from the dorsal surface of the  
320 skull, and a custom head plate was attached to  
321 the cranium using dental cement (Super Bond  
322 C&B), with an aperture approximately centred  
323 over the right primary visual cortex, or  
324 retrosplenial cortex. For injections into V1  
325 transcranial intrinsic signal imaging was then used  
326 to determine the precise location of V1, after  
327 which a 3mm circular craniotomy was performed,  
328 centred on the area of V1 which responded to  
329 visual stimulation at an elevation of 20 deg and  
330 azimuth of 30-40 deg. For injections into ACC a  
331 small craniotomy was first made over the region  
332 (0.3 mm lateral of bregma) either using a dental

333 drill or by thinning the overlying and then piercing  
334 a small hole using a hypodermic needle, after  
335 which a larger 3mm circular craniotomy was  
336 performed over V1. For injections into  
337 retrosplenial cortex for retrosplenial soma  
338 imaging a 3mm circular craniotomy was  
339 performed over the region (centred 0.4 mm  
340 lateral and 2.4 mm posterior to bregma). For  
341 imaging of retrosplenial cortex axons in V1, a  
342 small craniotomy was first made over  
343 retrosplenial cortex (centred 0.4 mm lateral and  
344 2.4 mm posterior to bregma) either using a dental  
345 drill or by thinning the overlying and then piercing  
346 a small hole using a hypodermic needle, after  
347 which a 3 mm circular craniotomy was performed  
348 over V1. After craniotomy injections of a virus to  
349 drive expression of GCaMP6S  
350 (AAV1.Syn.GCaMP6s.WPRE.SV40; titre after  
351 dilution  $2 \times 10^{11}$  GC/ml) were made into the  
352 relevant region (V1, depth = 250 $\mu$ m, 40nl at 1-3  
353 sites; ACC, depth = 800 $\mu$ m, 100nl at 1 site; RCx for  
354 soma imaging, depth = 250 $\mu$ m, 40nl at 1-3 sites;  
355 RCx for axon imaging, 40nl at 1 site). Injections  
356 were made using a microsyringe driver (WPI,  
357 UltraMicroPump) coupled to a pulled and  
358 bevelled oil filled glass micropipette with a tip  
359 outer diameter of approximately 30 $\mu$ m. After  
360 injection the craniotomy was closed with a glass  
361 insert constructed from 3 layers of circular no 1  
362 thickness glass (1x5 mm, 2x3 mm diameter)  
363 bonded together with optical adhesive (Norland  
364 Products; catalogue no. 7106). After surgery  
365 animals were allowed at least 2 weeks to recover  
366 after which they were either habituated to head  
367 fixation passively or during a visual discrimination  
368 task.

### 369 Imaging and locomotor behaviour

370 *In vivo* 2-photon imaging was performed using a  
371 resonant scanning microscope (Thorlabs, B-  
372 Scope) with a 16x 0.8NA objective (Nikon).  
373 GCaMP6 and tdTomato were excited at 980nm  
374 using a Ti:sapphire laser (Coherent, Chameleon)  
375 with a maximum laser power at sample of 50mW.

376 Data was acquired at approximately 60Hz and  
377 averaged, resulting in a framerate of  
378 approximately 10Hz. Cortical surface vascular  
379 landmarks were used to locate the same neurons  
380 between sessions. During 2-photon imaging  
381 animals were free to run on a custom designed  
382 fixed axis cylindrical treadmill, and movement  
383 was measured using a rotary encoder (Kübler,  
384 05.2400.1122.0100). Imaging, behavioral and  
385 visual stimulation timing data were acquired  
386 using custom written DAQ code (Matlab) and a  
387 DAQ card (NI PCIe-6323, National Instruments).

388 *In vivo* intrinsic signal imaging was performed  
389 using previously described methods<sup>3</sup> using either  
390 a custom built system based around a MAKO G-  
391 125B camera (AVT) or a commercially available  
392 system (Imager 3001, Optical Imaging Inc.)

### 393 Visual stimuli

394 For V1 recordings the preferred population  
395 retinotopic location of the field of view of neurons  
396 was determined in advance using circular 30x30  
397 deg drifting horizontal gratings with temporal  
398 frequency of 2 Hz and spatial frequency of 0.05  
399 cycles per degree. Each stimulus appeared and  
400 was stationary for 5 seconds, drifted for 2  
401 seconds, was stationary for 2 further seconds and  
402 then disappeared. Trials were spaced by 3  
403 seconds, during which a grey screen was  
404 displayed. Visual stimuli were generated using the  
405 psychophysics toolbox<sup>4</sup>, and displayed on  
406 calibrated LCD screens (Iiyama, BT481). Having  
407 established retinotopic preference, orientation  
408 tuning was next measured using circular gratings  
409 with the same temporal and spatial frequency, at  
410 the identified preferred location, and displayed at  
411 12 different orientations. For recordings of ACC  
412 axons in V1, RCx somas or RCx axons in V1 the  
413 visual stimulus was positioned in the binocular  
414 area directly in front of the animal.

### 415 Experimental design

416 In order to measure the effect of NMDAR  
417 blockade a 6 minute recording of baseline activity  
418 was made (either in V1 somas, ACC axons in V1,  
419 RCx somas or RCx axons in V1) during which the  
420 animal was exposed to horizontally oriented  
421 grating stimuli with the spatial and temporal  
422 frequency and position determined as described  
423 above, which varied in size between 10-60  
424 degrees in steps of 10 degrees. After this baseline  
425 period the recording and visual stimulation was  
426 briefly paused, animals were injected with either  
427 saline or MK801 (dose), after which the recording  
428 and visual stimulation was resumed for 45  
429 minutes.

### 430 Calcium imaging data analysis

431 Brain motion was first corrected for using an  
432 automated registration algorithm<sup>5</sup> implemented  
433 in Matlab, and data from the pre-injection  
434 administration period for registered to the post-  
435 injection period. A 20 $\mu$ m border was removed  
436 from all frames (more than the maximum brain  
437 movement observed) to ensure that all pixels  
438 were present in all frames in both sessions. Soma  
439 regions of interest were identified using a custom  
440 written semi-automated algorithm based on  
441 grouping of pixels with correlated time-courses.  
442 Pixels within each region of interest were then  
443 averaged and background fluorescence  
444 contamination was estimated from a 30 $\mu$ m  
445 circular area surrounding each soma ROI  
446 (excluding other ROIs) and subtracted from the  
447 soma ROI signal with a weighting of 0.7. Only cells  
448 with somas which were >5% brighter than  
449 surrounding neuropil were included in further  
450 analysis. For analysis of axonal data, labelled  
451 axons were first identified by thresholding the  
452 averaged movie frame for the ROI (90% of the 90<sup>th</sup>  
453 percentile value), and then averaging the time  
454 courses of the detected pixels. The time series of  
455 each ROI was then converted from a raw  
456 fluorescence value to dF/F with the denominator  
457 F value calculated as the 5<sup>th</sup> percentile of the



458 smoothed raw trace. Population activity was  
459 calculated as the mean timecourse of all detected  
460 neurons in a field of view smoothed with a 2.5  
461 minute sliding window. Correlation of excitatory  
462 and inhibitory populations were calculated by  
463 averaging the time courses of all identified  
464 excitatory and inhibitory neurons and then  
465 calculating the Pearson correlation coefficient in  
466 the baseline and post-saline/drug period. The  
467 timecourse of the coupling of excitatory and  
468 inhibitory populations was calculated by first  
469 smoothing the traces of both cell types with a  
470 sliding averaging window (window size of 5 secs),  
471 then normalising each trace to the baseline  
472 period (to control for baseline differences in  
473 levels of activity in the excitatory/inhibitory  
474 populations), and then dividing the excitatory  
475 trace by the inhibitory trace at each time point. In  
476 order to identify tdTomato labelled PV+ neurons,  
477 cells were semi-automatically classified based on  
478 a thresholded mean registered red channel  
479 image, which was eroded and then dilated to  
480 remove small areas of labelling of neural  
481 processes, after which classification was verified  
482 manually.

### 483 Support Vector Machine

484 The Support Vector Machine analysis was  
485 implemented in Matlab using the LIBSVM library  
486 with radial basis function kernel type and C-SVM  
487 multi-class classification options<sup>6</sup>. Visual stimulus  
488 identity was decoded from the responses of the  
489 entire population of recorded neurons from each  
490 animal, where individual neurons were  
491 considered as features. In order to calculate  
492 population decoding accuracy at baseline (**Fig 3a**),  
493 or post injection epoch-by-epoch analysis (**Fig**  
494 **3d**), a “leave-n-out” strategy was used to  
495 calculate and test the multiclass SVM, whereby  
496 the model was repeatedly trained on all but 10%  
497 of randomly chosen trials and then tested on the  
498 remaining trials. In order to test classification  
499 accuracy in the post-drug/saline period the  
500 classifier was trained on all trials from the

501 baseline period, and then tested on a sliding  
502 window of 30 independent trials, advancing in 1  
503 trial steps, from the post saline/drug  
504 administration period. This process was  
505 performed either on unmodified response  
506 amplitude data or on response amplitudes which  
507 had been normalised such that mean population  
508 response amplitudes in the pre and post injection  
509 conditions were equal. Performance was then  
510 normalised to the cross validated estimate of  
511 baseline classification accuracy. The SVM  
512 classification accuracy timecourse traces were  
513 then averaged across animals. Chance  
514 classification accuracy was calculated by testing  
515 the SVM model with shuffled stimulus identifiers.

### 516 Author contributions

517 A.R. and J.H. designed experiments. A.R.  
518 performed imaging experiments and analysed  
519 data. A.R., E.B. and A.P. performed surgeries. A.P.  
520 and E.B. provided histology data. E.B. and A.R.  
521 developed the anterior cingulate cortex imaging  
522 protocol. A.P. and A.R. developed the  
523 retrosplenial cortex imaging protocol. A.R. and  
524 J.H. wrote the paper.

### 525 Acknowledgments

526 This work was supported by a Wellcome Trust  
527 Strategic Award (503147) to Michael J Owen, JH,  
528 Lawrence Wilkinson, Adrian Harwood, Meng Li,  
529 David Linden, John Aggleton, Vincenzo Crunelli  
530 and Derek Jones and a Wellcome Trust ISSF  
531 Seedcorn Award to AR (508353). For the use of  
532 GCaMP6S we acknowledge Vivek Jayaraman, Rex  
533 A. Kerr, Douglas S. Kim, Loren L. Looger, Karel  
534 Svoboda from the GENIE Project, Janelia Farm  
535 Research Campus, Howard Hughes  
536 Medical Institute. We thank Chris Burgess for  
537 building parts of the data acquisition system, and  
538 Kenneth Harris for developing parts of the ROI  
539 detection pipeline. We thank Stuart Greenhill and  
540 Frank Sengpiel for helpful comments and  
541 discussion of the manuscript.

542 **Competing financial interests**

543 The authors have no competing financial  
544 interests.

545

546 **Supplementary Materials**

547

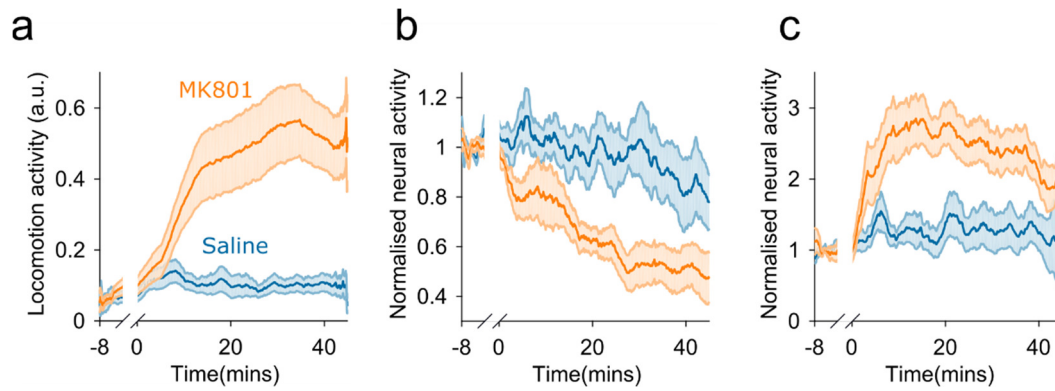

548

549 **Supplementary Figure 1: Hyper locomotion behaviour.** (a) Hyper locomotion observed following MK801  
550 administration. (b-c) As in **Figure 1e** and **Figure 1f**, but with analysis of V1 (b) and ACC axon (c)  
551 activity limited to periods of locomotion.

552

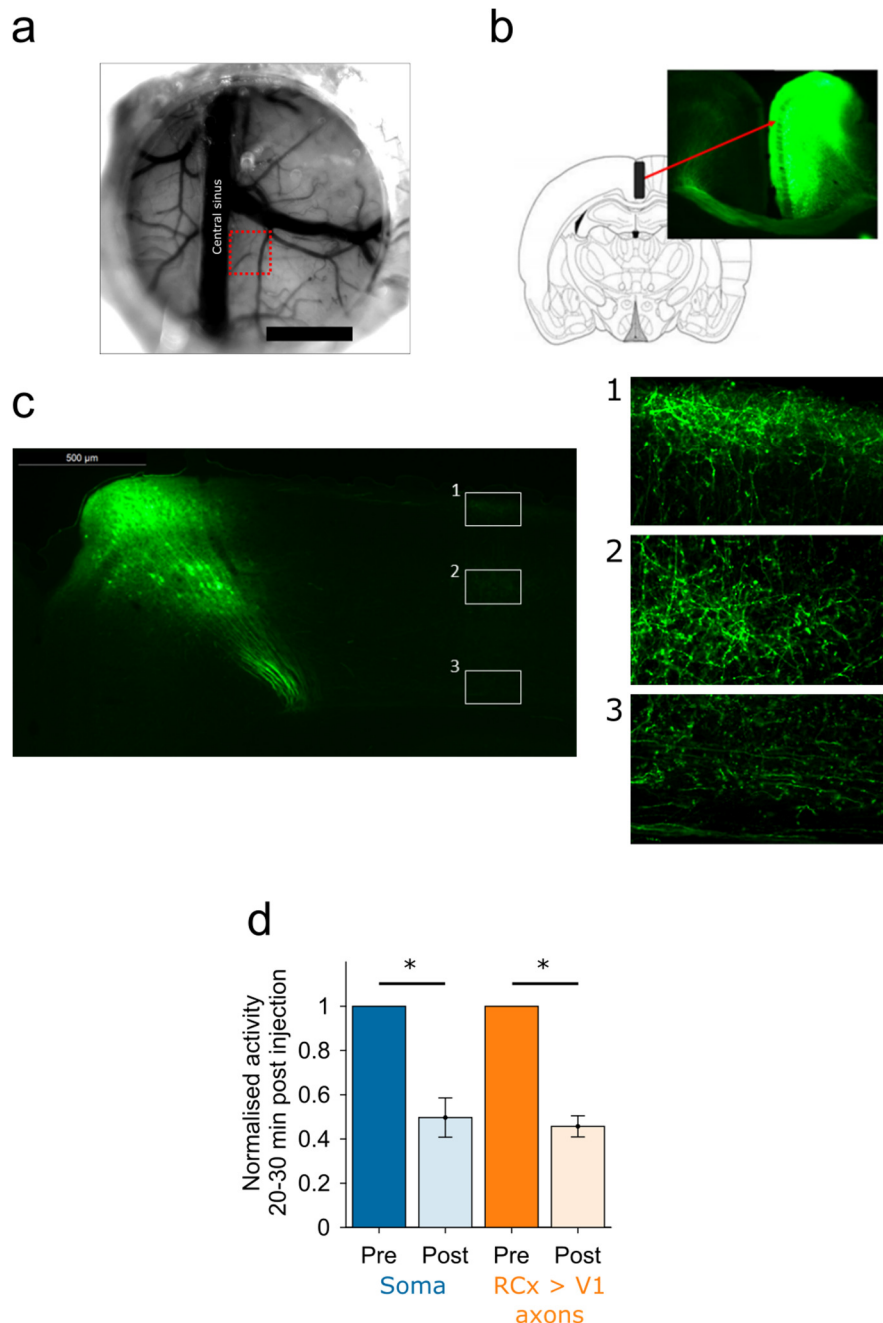

553

554

555

556

557

558

559

560

561

562

563

564

565

566

**Supplementary Figure 2: Effects of NMDAR antagonism on somas and axons of neurons from the same population in retrosplenial cortex (RCx).** We sought to control for the possibility that differences between the activity of axons from ACC and somas in V1 might be due to the neuronal compartment recorded from (somas vs. axons) rather than brain area differences. We examined this question by recording from the retrosplenial cortex which provides top-down input to the visual cortex and has somas which are optically accessible for 2-photon microscopy. This allowed quantification of another source of axonal top-down input to V1, as well as direct measurement of somas in the region from which the axons originate. This showed firstly that contrary to previous reports *in vitro*<sup>1</sup>, *in vivo* retrosplenial cortical activity is also strongly attenuated by MK801, and secondly that this is reflected in the calcium signals observed in the axons originating in the region. **(a)** Cranial window positioned over RCx. **(b)** Injection site and GCaMP6S expression 3 weeks post injection. **(c)** RCx innervation of visual cortex. **(d)** Normalised activity of RCx somas (blue) and RCx→V1 projecting axons (orange) following MK801 administration, showing similar pattern of reduced activity (baseline normalised activity: Somas =  $0.49 \pm 0.09$ ,  $P = 0.03$ ,  $n = 3$  mice, Axons =  $0.46 \pm 0.05$ ,  $P = 0.007$ ,  $n = 3$ ).



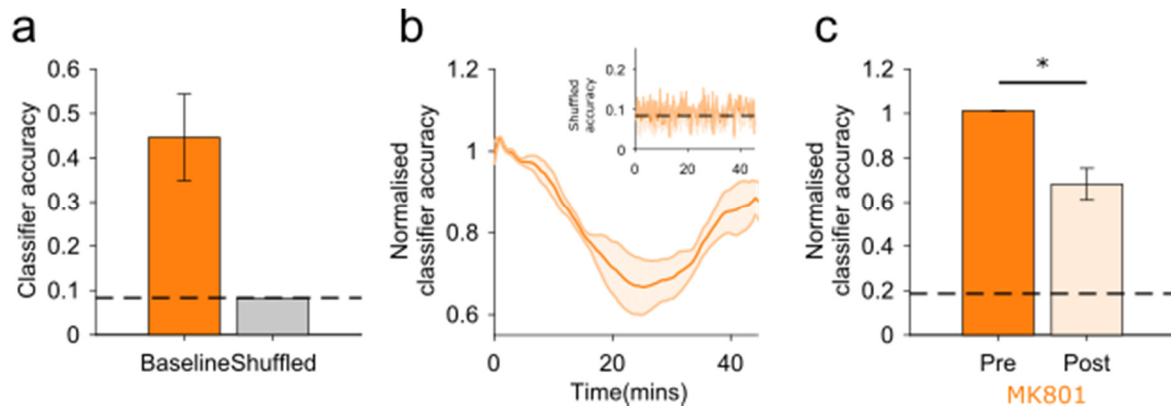

567

568

569

570

571

572

573

**Supplementary Figure 3: Support vector machine decoding of stimulus orientation.** (a) Baseline period support vector machine decoding accuracy compared to chance and shuffled (MK801 accuracy =  $45.5 \pm 0.1\%$ , shuffled accuracy =  $8.3 \pm 0.1\%$ ,  $n = 3$  animals). (b) Timecourse of classification accuracy following MK801 administration, and timecourse of shuffled performance (inset). (c) Average baseline normalised classification accuracy at 20-30mins post MK801 administration (normalised classification accuracy  $68.2 \pm 0.1\%$ ,  $p = 0.03$ ,  $n = 3$  animals).

574 **Supplementary Video 1: Timelapse video of activity of somas in V1 and ACC→V1 axons over the 45 minutes**  
575 **following MK801 administration.**

576

## 577 References

- 578 1. Li, Q., Clark, S., Lewis, D. V & Wilson, W.A. *J. Neurosci.* **22**, 3070–3080 (2002).
- 579 2. Goldey, G.J. et al. *Nat. Protoc.* **9**, 2515–2538 (2014).
- 580 3. Ranson, A., Cheetham, C.E.J., Fox, K. & Sengpiel, F. *Proc. Natl. Acad. Sci.* **109**, 1311–6 (2012).
- 581 4. Brainard, D.H. *Spat. Vis.* **10**, 433–436 (1997).
- 582 5. Guizar-Sicairos, M., Thurman, S.T. & Fienup, J.R. *Opt. Lett.* **33**, 156–158 (2008).
- 583 6. Chang, C. & Lin, C. *ACM Trans. Intell. Syst. Technol.* **2**, 1–39 (2013).

584
